# Supplementary material for: Perceived Factors Influencing Blue-Collar Workers’ Participation in Worksite Health Promotion Programs in Freight Transport: A Qualitative Investigation Using the TDF and COM-B
Source: Int J Environ Res Public Health. 2024 Jan 21;21(1):116. doi: 10.3390/ijerph21010116 (PMC10815228; doi:10.3390/ijerph21010116)
Supplement: Supplementary file 1 [file ijerph-21-00116-s001.zip]

Archive with 5 entries (5 files):
- S1 Interview guide.docx
- S2 Respondent characteristics.docx
- S3 COREQ Checklist.pdf
- S4 Sub-themes per TDF-domain.docx
- S5 Thematic Map.ppsx
